# Supplementary material for: Atomic scale modulation strategies and crystal phase transition of flower-like CoAl layered double hydroxides for supercapacitors
Source: Royal Society of Chemistry journal article supplement (doi:10.1039/d1ce01736e), 2022-01-01
Supplement: d1ce01736e1.pdf [file d1ce01736e1.pdf]

## Supplementary Information

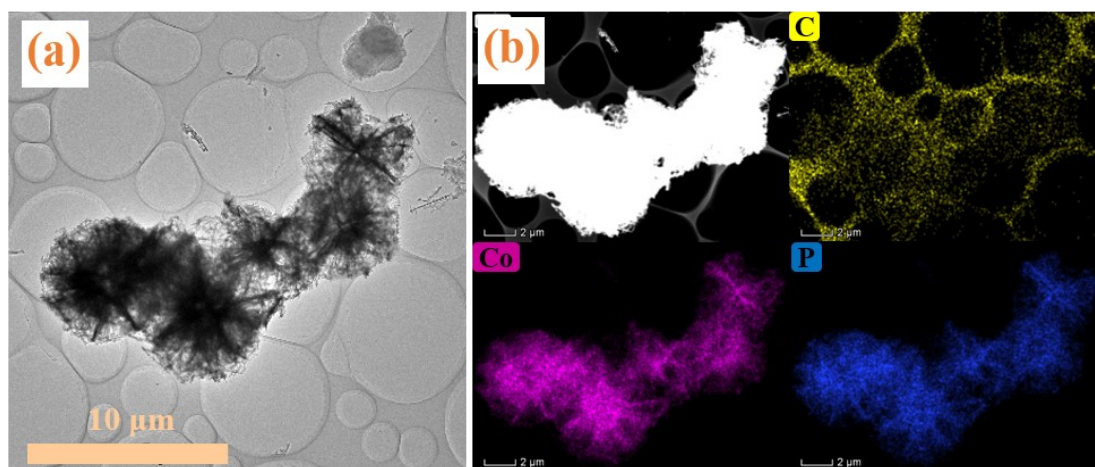

**Figure S1** (a) TEM image and (b) corresponding element mappings of CoPx.

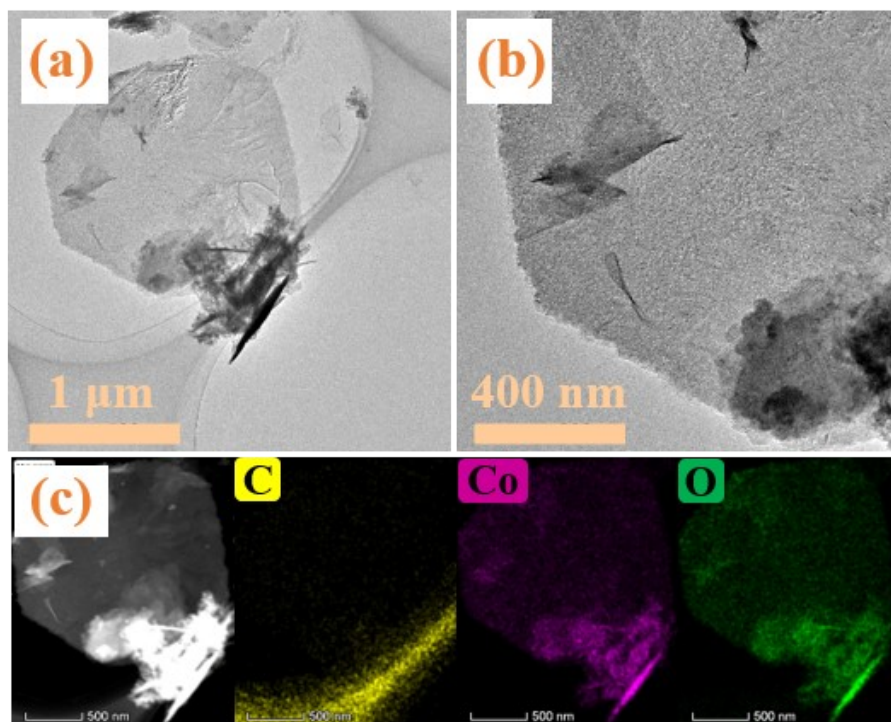

**Figure S2** (a-b) TEM images and (c) corresponding element mappings of e-CoPx.

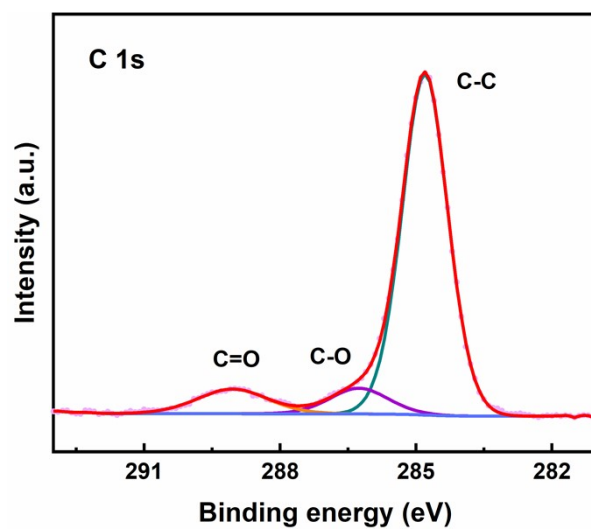

**Figure S3** C 1s high-resolution spectra of CoAl LDH.

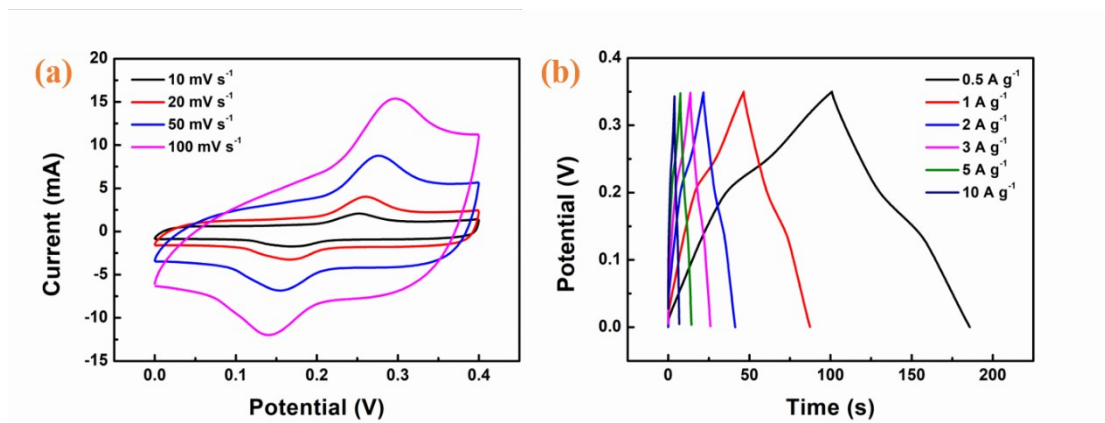

**Figure S4** (a) CV curves of CoOOH at different scan rates; (b) CC curves of CoOOH at different current densities.

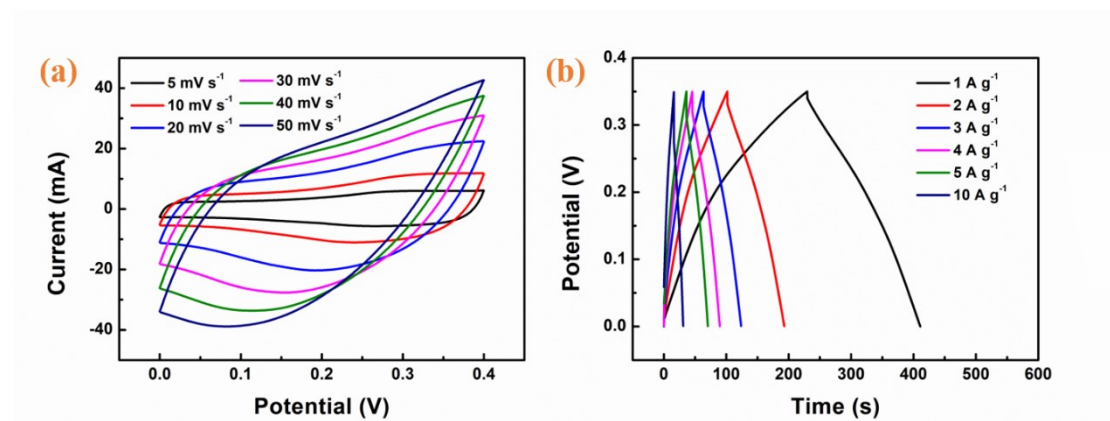

**Figure S5** (a) CV curves of CoPx at different scan rates; (b) CC curves of CoPx at different current densities.

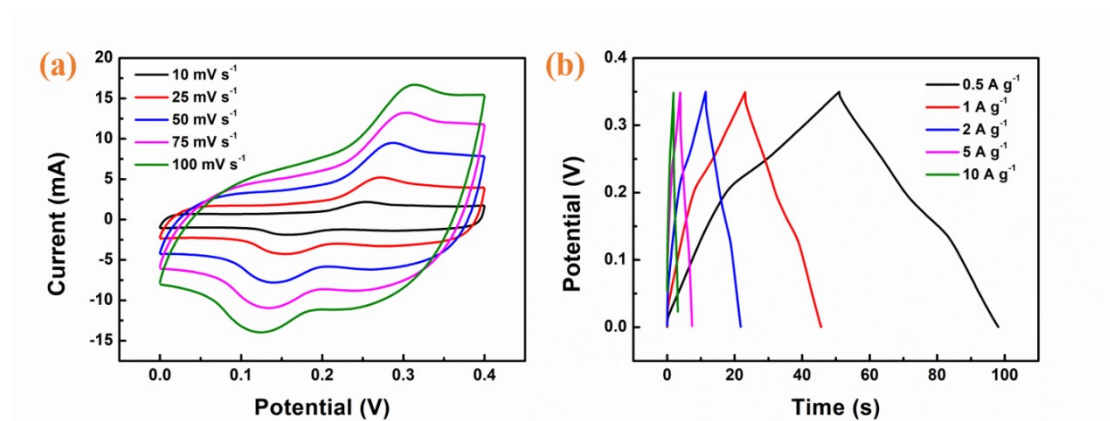

**Figure S6** (a) CV curves of e-CoPx at different scan rates; (b) CC curves of e-CoPx at different current densities.
